# Supplementary material
Source: PubMed Central journal article supplement (PMC1502498)

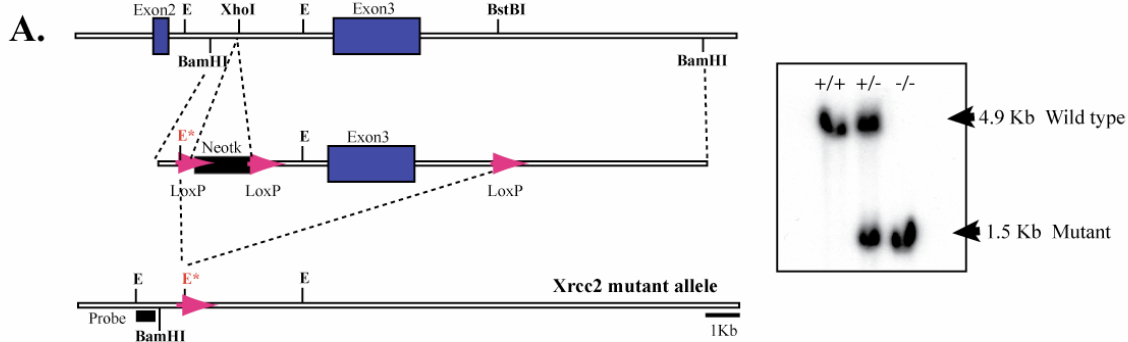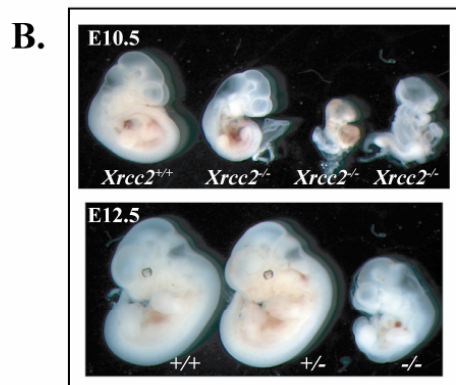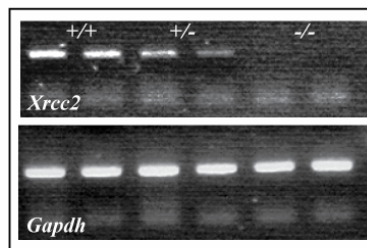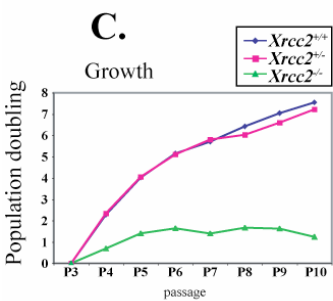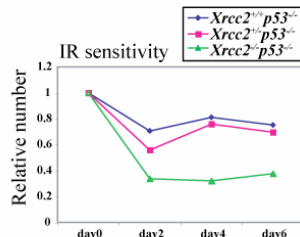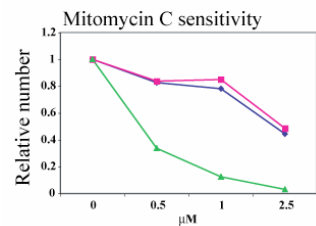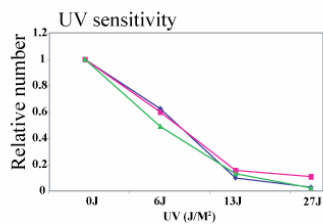

**D.**

| Cell line                  | Total breaks/Total cells | ctg | ctb | csb | fusion | radial |
|----------------------------|--------------------------|-----|-----|-----|--------|--------|
| <i>Xrc2</i> <sup>+/+</sup> | 3/82                     | 1   | 0   | 0   | 2      | 0      |
| <i>Xrc2</i> <sup>+/-</sup> | 8/97                     | 6   | 1   | 1   | 0      | 0      |
| <i>Xrc2</i> <sup>-/-</sup> | 116/45                   | 47  | 22  | 31  | 7      | 9      |

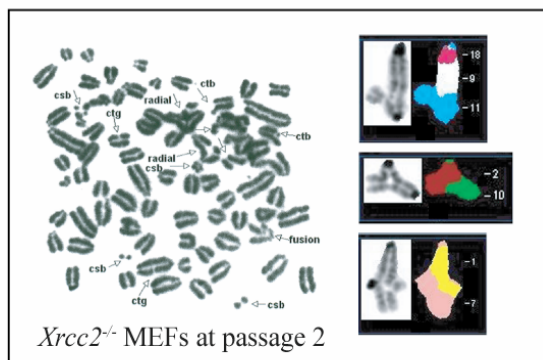

Supplement: pnas_0602436103_1.pdf [file pnas_0602436103_1.pdf]
